# Supplementary material
Source: MDPI journal article supplement (https://www.mdpi.com/2311-5521/6/6/230)
Supplement: s1 [file s1 › fluids-1189394-supplementary.pdf]

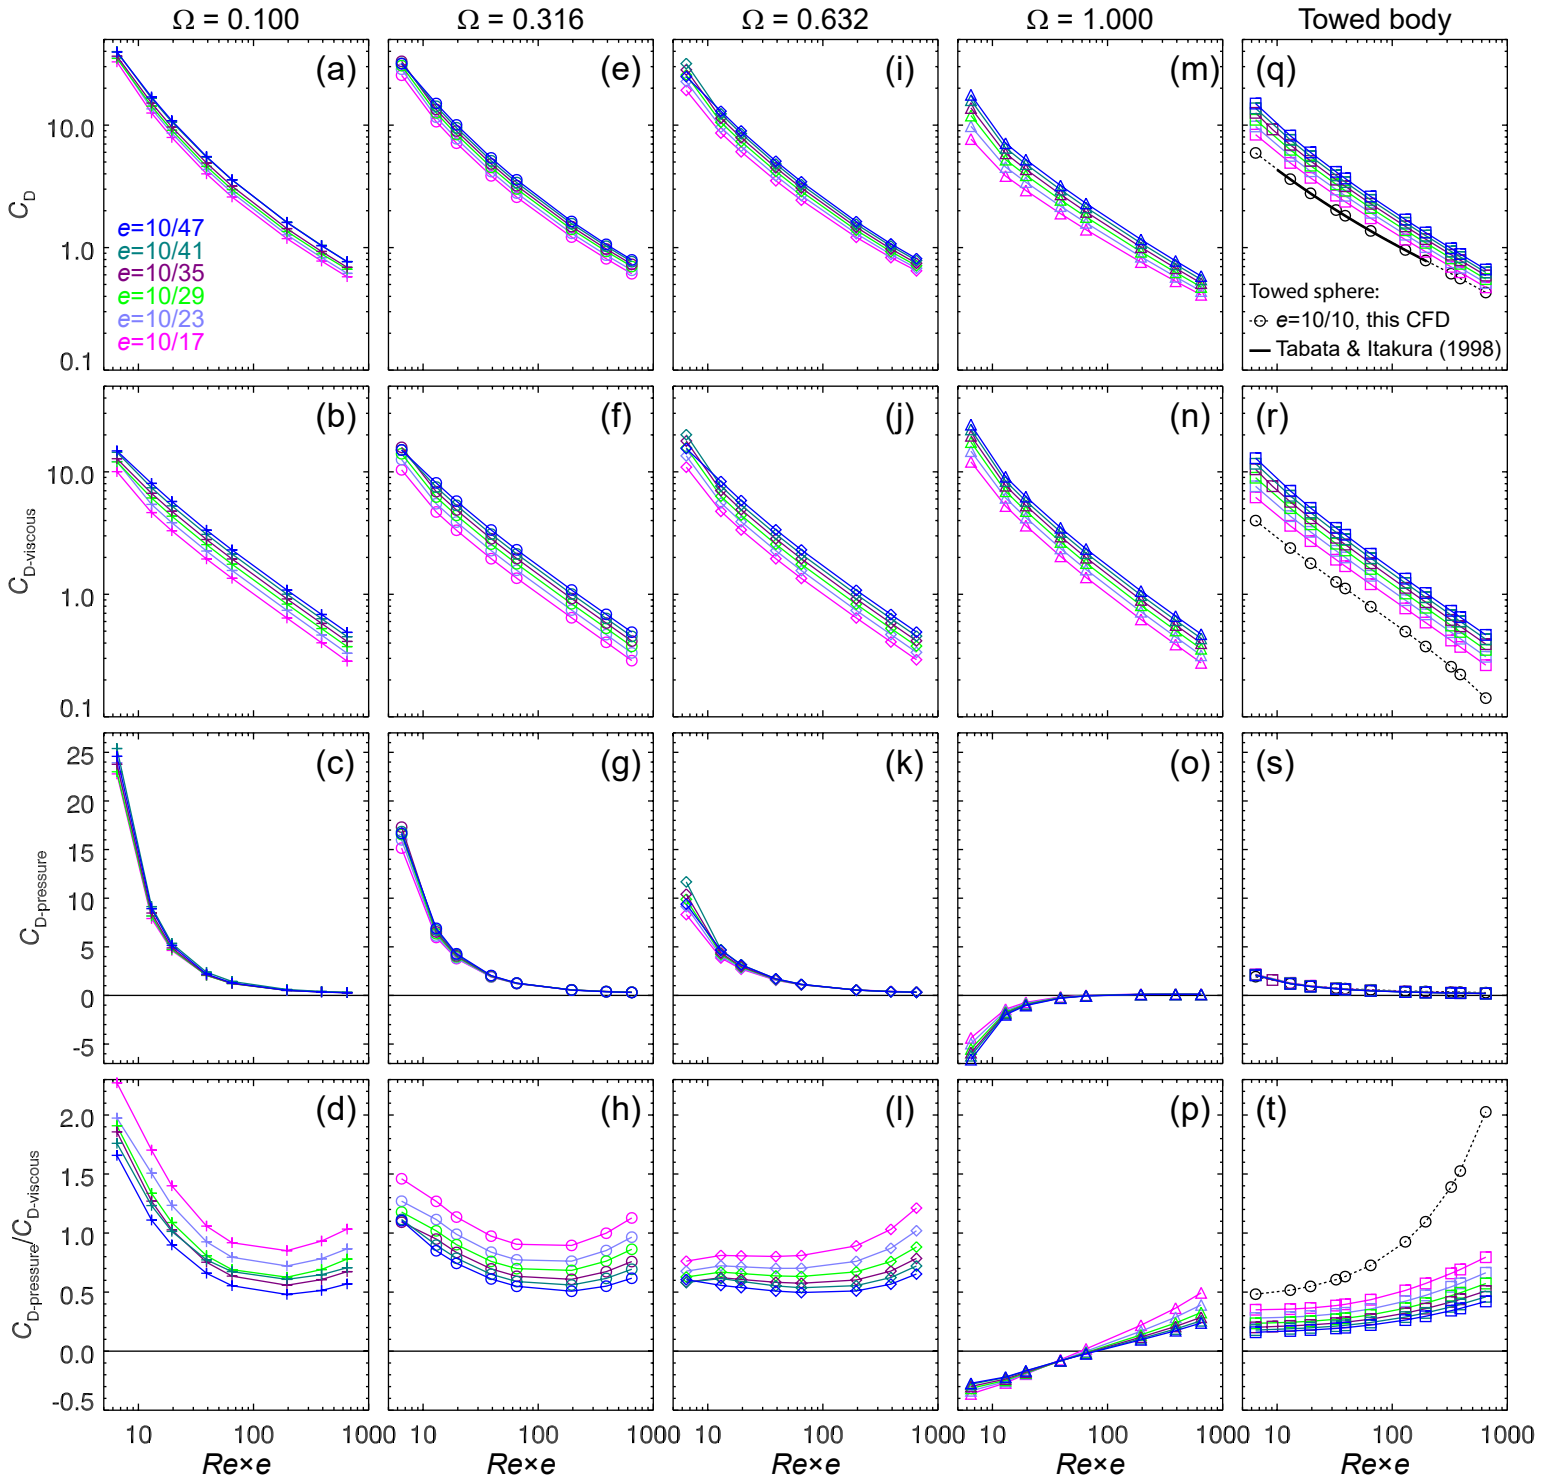

**Figure S1.** Line plots of  $C_D$ ,  $C_{D\text{-viscous}}$ ,  $C_{D\text{-pressure}}$ , and  $C_{D\text{-pressure}} / C_{D\text{-viscous}}$  against  $Re \times e$ , for four groups of six jet-propelled axisymmetric bodies of different body aspect ratios ( $e$ ; color-coded) combined with four different ratios of jet orifice diameter to body cross-sectional width, i.e.,  $\Omega = 0.100$  (a-d),  $\Omega = 0.316$  (e-h),  $\Omega = 0.632$  (i-l), and  $\Omega = 1.000$  (m-p), and for a group of six towed axisymmetric bodies of different body aspect ratios ( $e$ ; color-coded) (q-t). Also, the performance of the CFD simulations is validated by simulating the flow imposed by a steadily towed sphere (q), where the resulted  $C_D$ 's plotted against  $Re \times e$  (where  $e = 1$  for sphere) compare well to those simulated previously by Tabata and Itakura (1998). In (t), as  $Re$  decreases, the resulted  $C_{D\text{-pressure}} / C_{D\text{-viscous}}$  for the towed sphere approaches 0.5, the value for the Stokes flow around a steadily towed sphere.

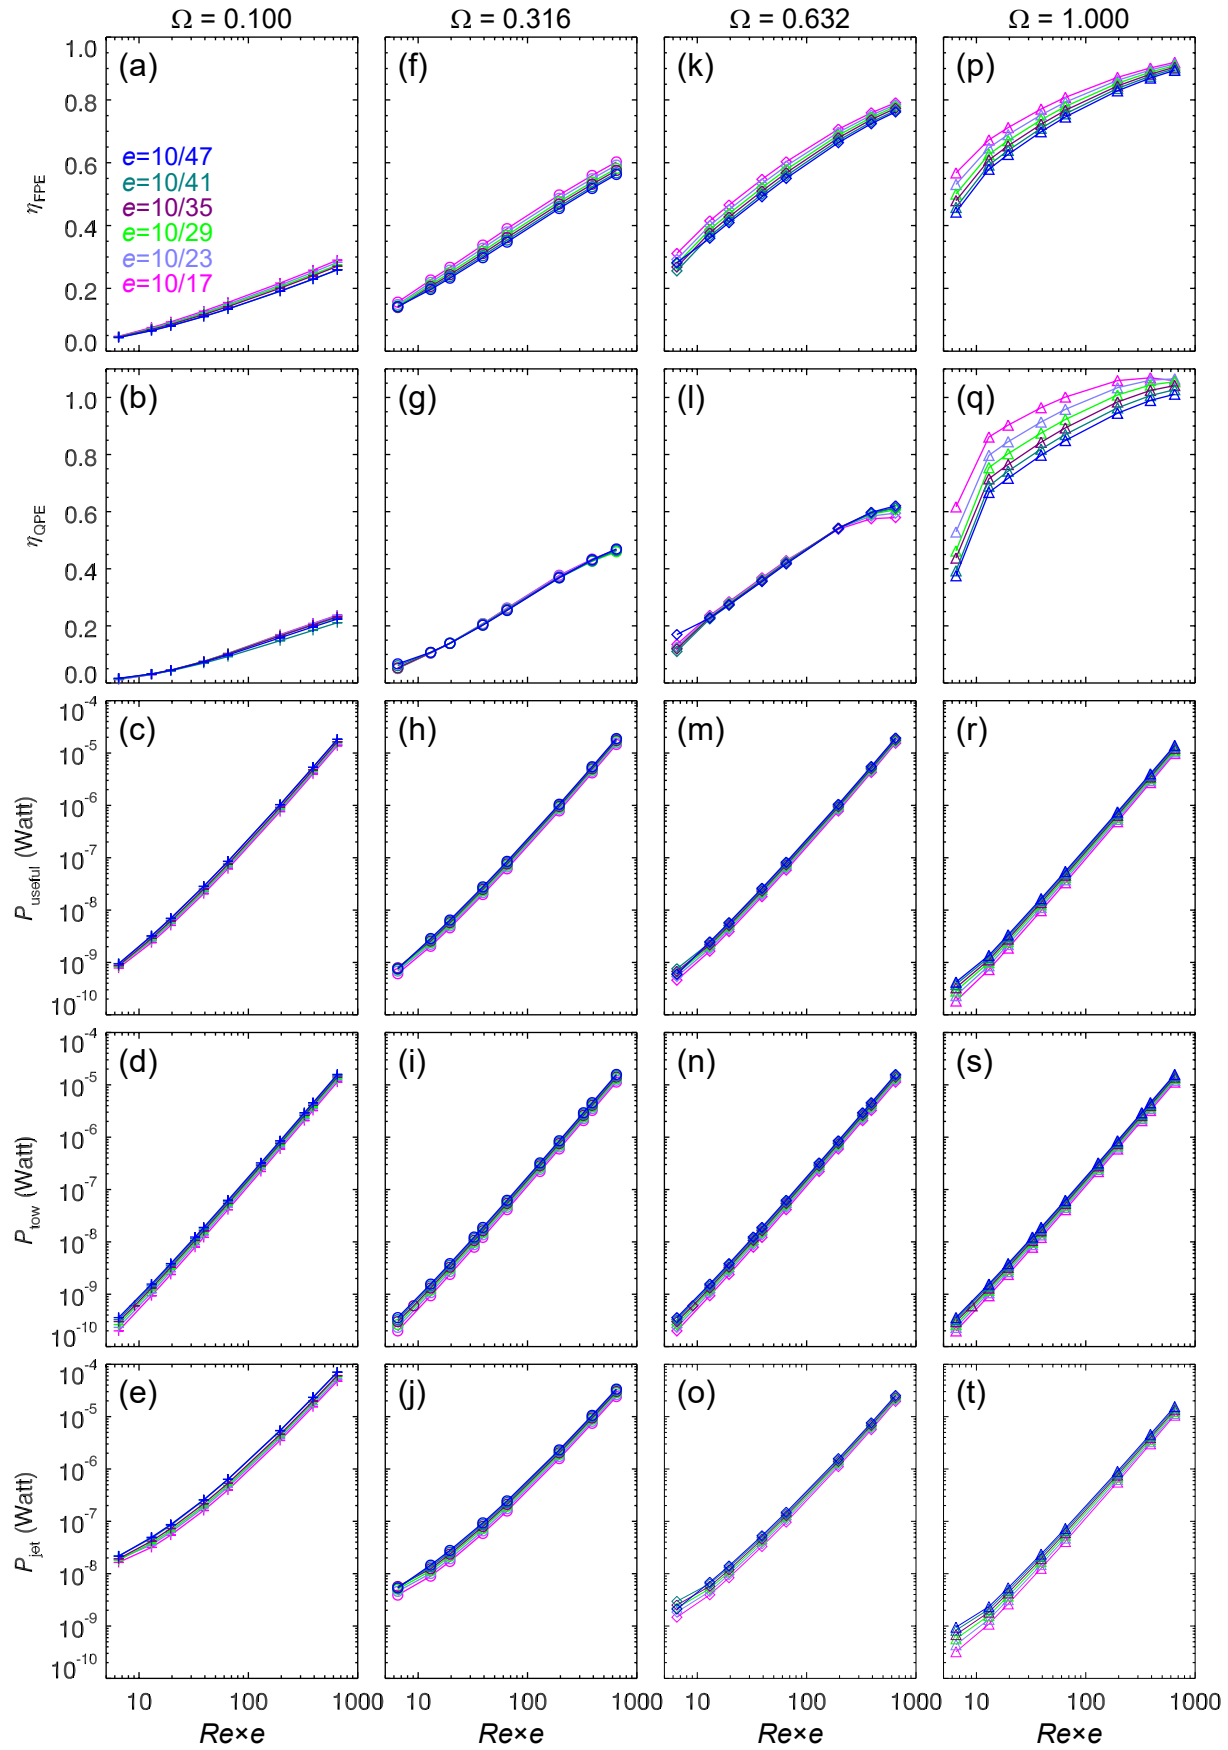

**Figure S2.** Line plots of  $\eta_{\text{FPE}}$  (Froude propulsion efficiency),  $\eta_{\text{QPE}}$  (quasi-propulsive efficiency),  $P_{\text{useful}}$  (useful power),  $P_{\text{tow}}$  (tow power), and  $P_{\text{jet}}$  (jet power) against  $Re \times e$ , for four groups of six jet-propelled axisymmetric bodies of different body aspect ratios ( $e$ ; color-coded) combined with four different ratios of jet orifice diameter to body cross-sectional width, i.e.,  $\Omega = 0.100$  (a-e),  $\Omega = 0.316$  (f-j),  $\Omega = 0.632$  (k-o), and  $\Omega = 1.000$  (p-t). Note that (d), (i), (n), and (s) are the same except for different plotting markers.

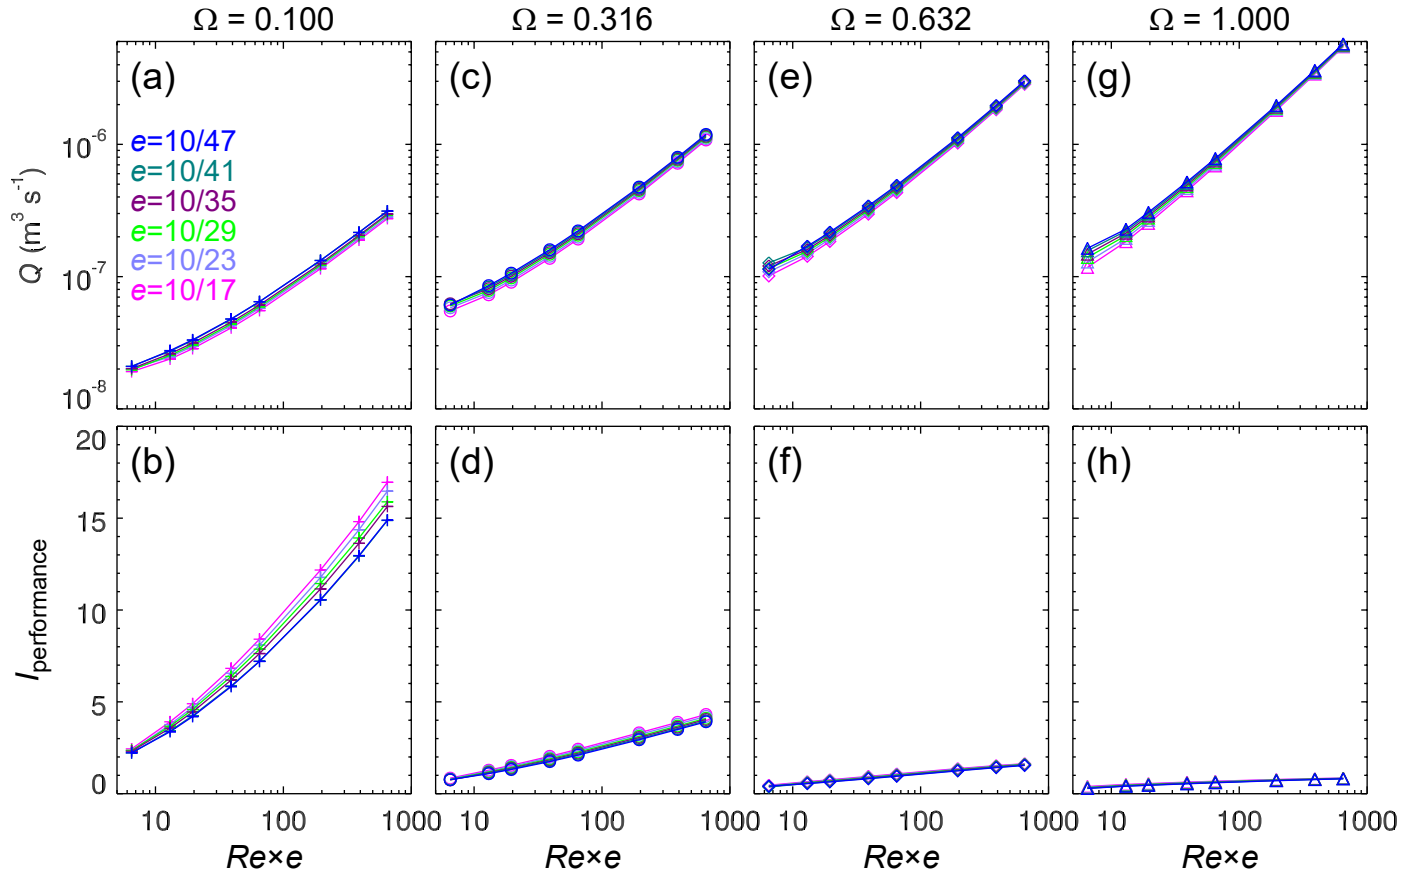

**Figure S3.** Line plots of  $Q$  (jet volume flow rate) and  $I_{\text{performance}}$  (jet-propulsion performance index) against  $Re \times e$ , for four groups of six jet-propelled axisymmetric bodies of different body aspect ratios ( $e$ ; color-coded) combined with four different ratios of jet orifice diameter to body cross-sectional width, i.e.,  $\Omega = 0.100$  (a, b),  $\Omega = 0.316$  (c, d),  $\Omega = 0.632$  (e, f), and  $\Omega = 1.000$  (g, h).
